# Supplementary material for: Recruitment of young adult cancer survivors into a randomized controlled trial of an mHealth physical activity intervention
Source: PubMed Central journal article supplement (PMC8981777; doi:10.1186/s13063-022-06148-5), 2022-04-04
Supplement: 13063_2022_6148_MOESM2_ESM.pdf [file 13063_2022_6148_MOESM2_ESM.pdf]

**Article title:** Recruitment of young adult cancer survivors into a randomized controlled trial of an mHealth physical activity intervention

**Author names:** Carmina G. Valle, Lindsey N. Camp, Molly Diamond, Brooke T. Nezami, Jessica Gokee LaRose, Bernardine M. Pinto, Deborah F. Tate

**Corresponding author:** Carmina G. Valle, PhD, MPH; University of North Carolina at Chapel Hill; [carmina.valle@unc.edu](mailto:carmina.valle@unc.edu)

## **Additional file 2. Organizations that shared IMPACT study recruitment information**

---

15-40 Connection

A Ballsy Sense of Tumor

Cervivor

Hope Lab

Lacuna Loft

Northwestern University Adolescent & Young Adult Cancer Program

The SamFund

Stanford Adolescent and Young Adult Cancer Program

Stupid Cancer

Teen Cancer America

True North Treks

University of North Carolina at Chapel Hill Adolescent and Young Adult Cancer Program

---
